# Supplementary material for: Effectiveness of an O-Alkyl Hydroxamate in Dogs with Naturally Acquired Canine Leishmaniosis: An Exploratory Clinical Trial
Source: MDPI journal article supplement (doi:10.3390/ani12192700), 2022-10-07

**Supplementary Table S1.** Evolution of the parasite loads and the clinical Score throughout the experiment in dogs treated with meglumine antimoniate. A value “-” for parasite load indicates a negative result in qPCR. BM = Bone Marrow parasite load, indicated in parasites/ $\mu$ L; LN = Lymph Node parasite load, indicated in parasites per microgram of DNA; PB = Peripheral Blood parasite load, indicated in parasites per 100  $\mu$ L; CS = Clinical Score.

|     |        | Parasite load or clinical score |        |         |         |
|-----|--------|---------------------------------|--------|---------|---------|
| dog | tissue | day 0                           | day 60 | day 120 | day 210 |
| 1   | BM     | -                               | 0.01   | -       | -       |
|     | LN     | 11.2                            | 1.6    | -       | 17.8    |
|     | PB     | 0.33                            | -      | 1.1     | -       |
|     | CS     | 3                               | 6      | 4       | 1       |
| 2   | BM     | -                               | -      | -       | -       |
|     | LN     | 172.1                           | 1.1    | -       | -       |
|     | PB     | 0.23                            | 0.19   | 26.2    | -       |
|     | CS     | 2                               | 1      | 2       | 1       |
| 3   | BM     | 2124.4                          | 1158.4 | 185.4   | 1.8     |
|     | LN     | 63.6                            | 66.2   | 129.2   | 69.6    |
|     | PB     | 105.9                           | 48.2   | 1.0     | -       |
|     | CS     | 18                              | 24     | 18      | 20      |
| 4   | BM     | 0.01                            | 0.01   | 0.02    | 0.13    |
|     | LN     | -                               | -      | 7.1     | 5.8     |
|     | PB     | 0.68                            | -      | 0.42    | -       |
|     | CS     | 2                               | 3      | 2       | 2       |
| 5   | BM     | 0.01                            | 0.02   | 0.06    | 0.09    |
|     | LN     | 1.3                             | 25.4   | 108.4   | 26.7    |

|   |    |      |      |     |      |
|---|----|------|------|-----|------|
|   | PB | 0.10 | 0.34 | 1.9 | 0.67 |
|   | CS | 2    | 7    | 5   | 5    |
| 6 | BM | 0.29 | 0.11 | -   | -    |
|   | LN | -    | -    | -   | 0.04 |
|   | PB | 1.50 | -    | 3.4 | 0.29 |
|   | CS | 2    | 2    | 1   | 4    |

**Supplementary Table S2.** Evolution of the antibody titres and the cytokine expression levels throughout the experiment in dogs treated with meglumine antimoniate. Value = 0 for antibody titre denotes an antibody titre lower than 20. IgG = Total IgG antibody titre; IgG1 = IgG1 antibody titre; IgG2 = IgG2 antibody titre; IFNG = Interferon gamma relative expression level; IL4 = Interleukin 4 relative expression level.

|     |           | Antibody titre or cytokine expression level |        |         |         |
|-----|-----------|---------------------------------------------|--------|---------|---------|
| Dog | Parameter | day 0                                       | day 60 | day 120 | day 210 |
| 1   | IgG       | 640                                         | 320    | 320     | 320     |
|     | IgG1      | 40                                          | 40     | 40      | 80      |
|     | IgG2      | 1280                                        | 640    | 1280    | 640     |
|     | IFNG      | 4.7                                         | 2.0    | 12.0    | 0.25    |
|     | IL4       | 0.16                                        | 0.41   | 0.13    | 0.03    |
| 2   | IgG       | 40                                          | 80     | 80      | 40      |
|     | IgG1      | 0                                           | 0      | 0       | 0       |
|     | IgG2      | 20                                          | 20     | 0       | 0       |
|     | IFNG      | 5.7                                         | 4.3    | 3.3     | 10.6    |
|     | IL4       | 3.6                                         | 0.79   | 1.3     | 0.11    |
| 3   | IgG       | 1280                                        | 1280   | 1280    | 1280    |

|   |      |      |      |      |      |
|---|------|------|------|------|------|
|   | IgG1 | 1280 | 1280 | 1280 | 1280 |
|   | IgG2 | 1280 | 1280 | 1280 | 1280 |
|   | IFNG | 3.4  | 0.02 | 0.36 | 0.10 |
|   | IL4  | 0.03 | 0.03 | 0.03 | 0.03 |
| 4 | IgG  | 80   | 80   | 160  | 320  |
|   | IgG1 | 0    | 20   | 0    | 80   |
|   | IgG2 | 160  | 80   | 20   | 640  |
|   | IFNG | 0.27 | 0.04 | 0.04 | 0.12 |
|   | IL4  | 0.11 | 0.04 | 0.75 | 0.21 |
| 5 | IgG  | 320  | 80   | 80   | 40   |
|   | IgG1 | 0    | 40   | 0    | 0    |
|   | IgG2 | 160  | 320  | 80   | 80   |
|   | IFNG | 1.0  | 0.46 | 7.1  | 0.10 |
|   | IL4  | 0.03 | 0.01 | 1.1  | 32.7 |
| 6 | IgG  | 40   | 20   | 0f   | 20   |
|   | IgG1 | 0    | 0    | 0    | 0    |
|   | IgG2 | 40   | 40   | 0    | 40   |
|   | IFNG | 0.13 | 0.95 | 11.7 | 3.1  |
|   | IL4  | 3.6  | 0.09 | 0.11 | 0.11 |

**Supplementary Table S3.** Baseline clinical picture of the animals before the intervention: breed, age, sex and estimated time from infection. Age is shown in years. Estimated time of infection is shown in months according to the owners' assessment. F =Female, M =Male, WL =Weight loss, LA =Lymphadenomegaly, ED =Exfoliative dermatitis, OG =Onychogryphosis, ME =Mentation, UK =Uveitis or Keratitis, HK =hyperkeratosis in truffle or pads, AL =alopecia, AA =Arregenerative anemia, AG =Low albumin/globulin ratio, UD =Ulcerative dermatitis, ND =Nodular dermatitis.

| Dog | Breed             | Age | Sex | Time from infection | Clinical signs                            | IFAT titre |
|-----|-------------------|-----|-----|---------------------|-------------------------------------------|------------|
| 1   | Labrador          | 3   | F   | 6                   | WL, LA, ED                                | 1280       |
| 2   | Mongrel           | 3   | M   | 6                   | LA, OG                                    | 160        |
| 3   | Boxer             | 4   | M   | 9                   | WL, ME, LA, UD, OG,<br>HK, AL, AA, AG, ED | 1280       |
| 4   | Malinois shepherd | 5   | F   | 8                   | LA, OG, ME                                | 320        |
| 5   | Boxer             | 3   | M   | 7                   | LA, UK                                    | 160        |
| 6   | Hound             | 3   | M   | 6                   | WL, LA                                    | 80         |
| 7   | Mastiff           | 1   | M   | 2                   | WL, LA, UD, ME                            | 80         |
| 8   | Mongrel           | 5   | M   | 9                   | LA, ED                                    | 640        |
| 9   | Mongrel           | 3   | F   | 4                   | LA, OG, UK, HK                            | 320        |
| 10  | Labrador          | 3   | F   | 7                   | LA, OG                                    | 80         |
| 11  | Hound             | 3   | M   | 7                   | LA, OG, UK, WL, ME,<br>ED                 | 80         |
| 12  | Hound             | 3   | M   | 8                   | OG, LA, UK, WL, ED,<br>HK                 | 320        |
| 13  | Mongrel           | 3   | F   | 6                   | LA, OG, ED, UD, ND,                       | 1280       |

|    |                         |   |   |   |                |     |
|----|-------------------------|---|---|---|----------------|-----|
|    |                         |   |   |   | WL             |     |
| 14 | Shar Pei                | 2 | M | 4 | UD, UK         | 160 |
| 15 | Labrador                | 2 | M | 4 | WL, UD, LA     | 80  |
| 16 | German Shepherd         | 6 | M | 3 | LA, ED         | 80  |
| 17 | Hound                   | 4 | M | 3 | LA, OG, UD, WL | 320 |
| 18 | Duck trolling retriever | 2 | M | 1 | UD, ED         | 80  |

**Supplementary Figure S1.** Evolution of parasite load in bone marrow. The figure shows the average percentage (%) parasite load compared to the baseline parasite load before treatment (on day 0). Groups treated with MTC-305, meglumine antimoniate (MA) or a combination of both (COMB).

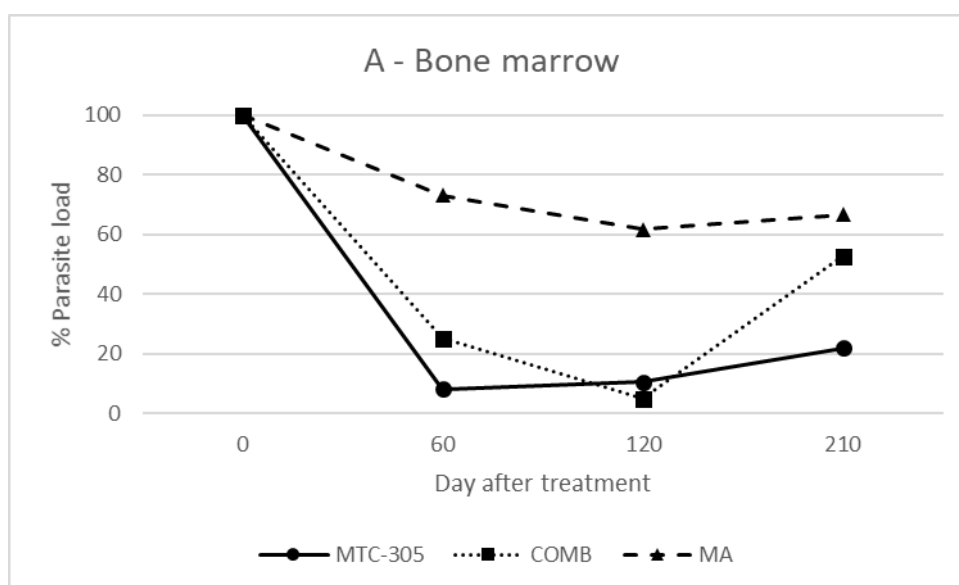

**Supplementary Figure S2.** Evolution of parasite load in lymph node. The figure shows the average percentage (%) parasite load compared to the baseline parasite load before treatment (on day 0). Groups treated with MTC-305, meglumine antimoniate (MA) or a combination of both (COMB).

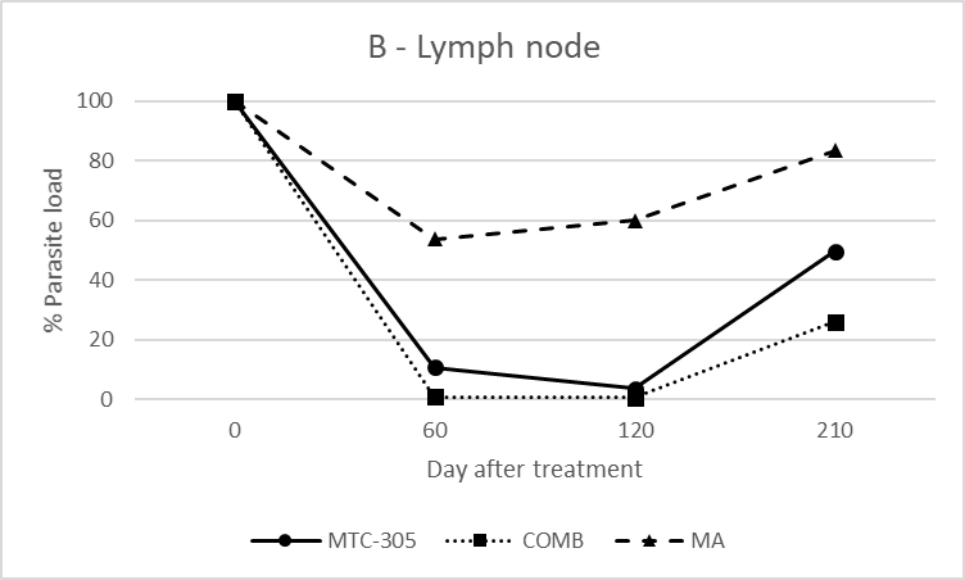

**Supplementary Figure S3.** Evolution of parasite load in peripheral blood. The figure shows the average percentage (%) parasite load compared to the baseline parasite load before treatment (on day 0). Groups treated with MTC-305, meglumine antimoniate (MA) or a combination of both (COMB).

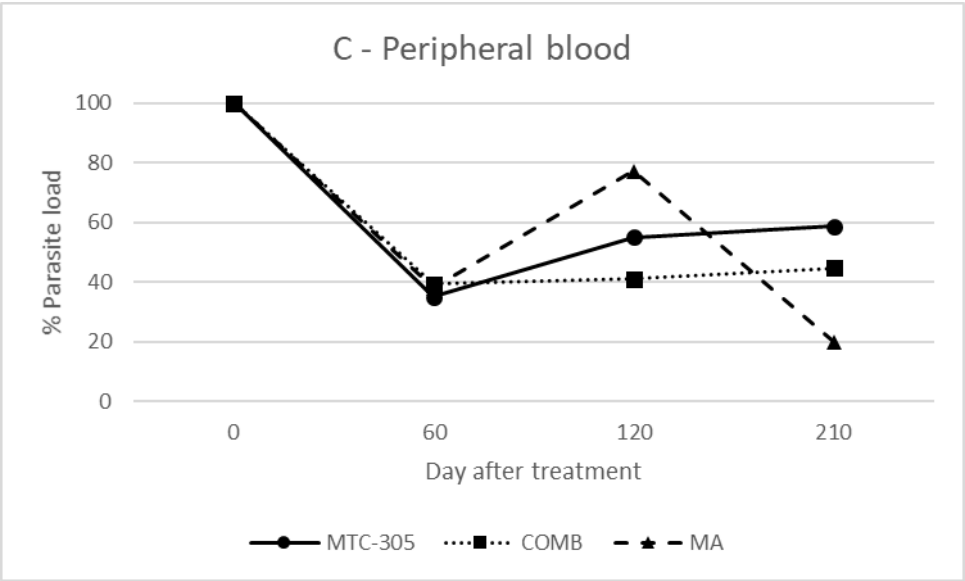

Supplementary Figure S4. Evolution of clinical score. The figure shows the average percentage (%) clinical score compared to the baseline before treatment (on day 0). Groups treated with MTC-305, meglumine antimoniate (MA) or a combination of both (COMB).

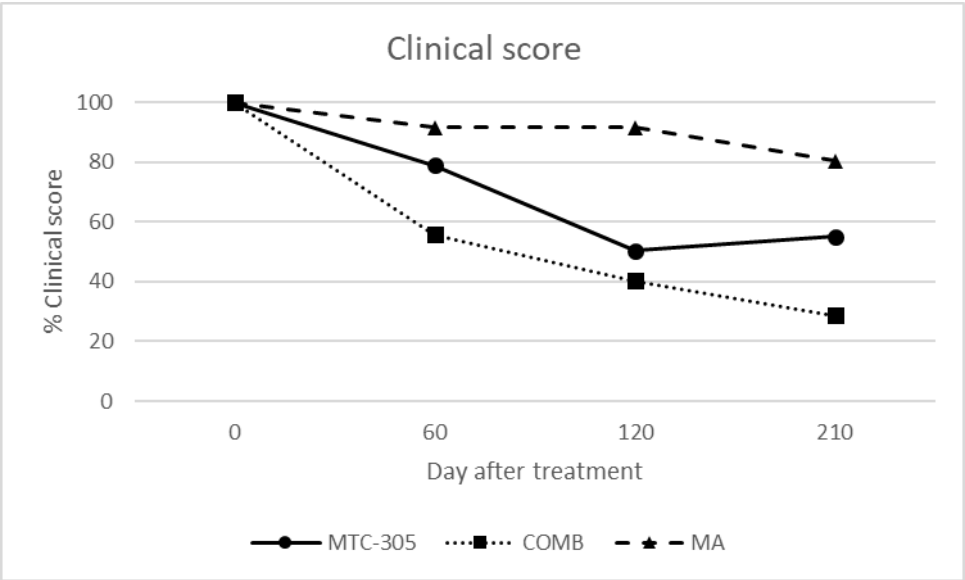

Supplement: s1 [file s1]
